# Supplementary material for: Preliminary Assessment of Microbial Community Structure of Wind-Tidal Flats in the Laguna Madre, Texas, USA
Source: MDPI journal article supplement (doi:10.3390/biology9080183), 2020-07-22
Supplement: s1 [file s1]

[illegible]

[illegible]

GMD14H01

|     |     |     |     |     |     |     |     |     |     |     |          |                  |                  |                       |                       |                       |                       |                       |  |  |
|-----|-----|-----|-----|-----|-----|-----|-----|-----|-----|-----|----------|------------------|------------------|-----------------------|-----------------------|-----------------------|-----------------------|-----------------------|--|--|
| 0   | 0   | 58  | 0   | 8   | 0   | 0   | 0   | 3   | 9   | 0   | Bacteria | Desulfobacterota | Desulfurimonada  | Bradyrhodospirillales | Bradyrhodospirillales | unclassified_Bacteria | unclassified_Bacteria |                       |  |  |
| 0   | 0   | 0   | 0   | 0   | 0   | 0   | 22  | 0   | 0   | 0   | Bacteria | Desulfobacterota | Desulfurimonada  | Bradyrhodospirillales | Bradyrhodospirillales | unclassified_Bacteria | unclassified_Bacteria |                       |  |  |
| 0   | 0   | 0   | 59  | 0   | 0   | 0   | 0   | 0   | 29  | 0   | Bacteria | Desulfobacterota | Desulfurimonada  | Bradyrhodospirillales | Bradyrhodospirillales | unclassified_Bacteria | unclassified_Bacteria |                       |  |  |
| 0   | 0   | 0   | 0   | 23  | 23  | 0   | 0   | 0   | 0   | 0   | Bacteria | Desulfobacterota | Desulfurimonada  | Bradyrhodospirillales | Bradyrhodospirillales | unclassified_Bacteria | unclassified_Bacteria |                       |  |  |
| 0   | 0   | 0   | 0   | 0   | 0   | 0   | 0   | 0   | 0   | 0   | Bacteria | Desulfobacterota | Desulfurimonada  | Bradyrhodospirillales | Bradyrhodospirillales | unclassified_Bacteria | unclassified_Bacteria |                       |  |  |
| 0   | 24  | 0   | 0   | 41  | 117 | 0   | 0   | 0   | 110 | 56  | Bacteria | Desulfobacterota | Desulfurimonada  | Bradyrhodospirillales | Bradyrhodospirillales | unclassified_Bacteria | unclassified_Bacteria |                       |  |  |
| 0   | 45  | 0   | 121 | 0   | 0   | 27  | 0   | 61  | 0   | 0   | Bacteria | Desulfobacterota | Desulfurimonada  | Bradyrhodospirillales | Bradyrhodospirillales | unclassified_Bacteria | unclassified_Bacteria |                       |  |  |
| 0   | 43  | 0   | 15  | 125 | 179 | 0   | 0   | 63  | 63  | 63  | Bacteria | Desulfobacterota | Desulfurimonada  | Bradyrhodospirillales | Bradyrhodospirillales | unclassified_Bacteria | unclassified_Bacteria |                       |  |  |
| 0   | 0   | 0   | 0   | 33  | 0   | 0   | 0   | 0   | 0   | 0   | Bacteria | Desulfobacterota | Desulfurimonada  | Bradyrhodospirillales | Bradyrhodospirillales | unclassified_Bacteria | unclassified_Bacteria |                       |  |  |
| 0   | 0   | 0   | 0   | 0   | 0   | 0   | 0   | 0   | 0   | 0   | Bacteria | Desulfobacterota | Desulfurimonada  | Bradyrhodospirillales | Bradyrhodospirillales | unclassified_Bacteria | unclassified_Bacteria |                       |  |  |
| 0   | 0   | 0   | 0   | 0   | 0   | 0   | 0   | 0   | 0   | 0   | Bacteria | Desulfobacterota | Desulfurimonada  | Bradyrhodospirillales | Bradyrhodospirillales | unclassified_Bacteria | unclassified_Bacteria |                       |  |  |
| 30  | 97  | 13  | 27  | 82  | 94  | 0   | 0   | 14  | 36  | 54  | 26       | Bacteria         | Desulfobacterota | Desulfurimonada       | Bradyrhodospirillales | Bradyrhodospirillales | unclassified_Bacteria | unclassified_Bacteria |  |  |
| 0   | 99  | 0   | 19  | 37  | 43  | 247 | 0   | 43  | 67  | 155 | 66       | Bacteria         | Desulfobacterota | Desulfurimonada       | Bradyrhodospirillales | Bradyrhodospirillales | unclassified_Bacteria | unclassified_Bacteria |  |  |
| 0   | 0   | 0   | 0   | 0   | 0   | 0   | 0   | 0   | 0   | 26  | Bacteria | Desulfobacterota | Desulfurimonada  | Bradyrhodospirillales | Bradyrhodospirillales | unclassified_Bacteria | unclassified_Bacteria |                       |  |  |
| 0   | 0   | 0   | 0   | 67  | 97  | 77  | 0   | 60  | 0   | 95  | 81       | Bacteria         | Desulfobacterota | Desulfurimonada       | Bradyrhodospirillales | Bradyrhodospirillales | unclassified_Bacteria | unclassified_Bacteria |  |  |
| 0   | 0   | 0   | 0   | 0   | 0   | 0   | 0   | 0   | 0   | 0   | 0        | Bacteria         | Desulfobacterota | Desulfurimonada       | Bradyrhodospirillales | Bradyrhodospirillales | unclassified_Bacteria | unclassified_Bacteria |  |  |
| 131 | 111 | 122 | 154 | 208 | 329 | 111 | 184 | 282 | 294 | 294 | 294      | Bacteria         | Desulfobacterota | Desulfurimonada       | Bradyrhodospirillales | Bradyrhodospirillales | unclassified_Bacteria | unclassified_Bacteria |  |  |
| 0   | 77  | 0   | 0   | 0   | 0   | 0   | 0   | 0   | 0   | 0   | 0        | Bacteria         | Desulfobacterota | Desulfurimonada       | Bradyrhodospirillales | Bradyrhodospirillales | unclassified_Bacteria | unclassified_Bacteria |  |  |
| 0   | 0   | 0   | 0   | 0   | 61  | 0   | 0   | 0   | 0   | 0   | 0        | Bacteria         | Desulfobacterota | Desulfurimonada       | Bradyrhodospirillales | Bradyrhodospirillales | unclassified_Bacteria | unclassified_Bacteria |  |  |
| 44  | 69  | 0   | 45  | 162 | 167 | 0   | 0   | 0   | 0   | 0   | 0        | Bacteria         | Desulfobacterota | Desulfurimonada       | Bradyrhodospirillales | Bradyrhodospirillales | unclassified_Bacteria | unclassified_Bacteria |  |  |
| 0   | 0   | 0   | 133 | 0   | 0   | 0   | 0   | 0   | 0   | 0   | 0        | Bacteria         | Desulfobacterota | Desulfurimonada       | Bradyrhodospirillales | Bradyrhodospirillales | unclassified_Bacteria | unclassified_Bacteria |  |  |
| 0   | 46  | 64  | 0   | 0   | 0   | 0   | 0   | 0   | 0   | 0   | 0        | Bacteria         | Desulfobacterota | Desulfurimonada       | Bradyrhodospirillales | Bradyrhodospirillales | unclassified_Bacteria | unclassified_Bacteria |  |  |
| 0   | 0   | 0   | 0   | 151 | 55  | 0   | 28  | 51  | 27  | 56  | 179      | Bacteria         | Desulfobacterota | Desulfurimonada       | Bradyrhodospirillales | Bradyrhodospirillales | unclassified_Bacteria | unclassified_Bacteria |  |  |
| 0   | 0   | 0   | 39  | 0   | 0   | 0   | 0   | 0   | 0   | 0   | 0        | Bacteria         | Desulfobacterota | Desulfurimonada       | Bradyrhodospirillales | Bradyrhodospirillales | unclassified_Bacteria | unclassified_Bacteria |  |  |
| 0   | 0   | 0   | 0   | 91  | 183 | 199 | 0   | 231 | 91  | 86  | 76       | Bacteria         | Desulfobacterota | Desulfurimonada       | Bradyrhodospirillales | Bradyrhodospirillales | unclassified_Bacteria | unclassified_Bacteria |  |  |
| 0   | 21  | 0   | 0   | 0   | 0   | 0   | 0   | 0   | 11  | 0   | 0        | Bacteria         | Desulfobacterota | Desulfurimonada       | Bradyrhodospirillales | Bradyrhodospirillales | unclassified_Bacteria | unclassified_Bacteria |  |  |
| 0   | 0   | 0   | 0   | 20  | 15  | 0   | 0   | 12  | 0   | 11  | 20       | Bacteria         | Desulfobacterota | Desulfurimonada       | Bradyrhodospirillales | Bradyrhodospirillales | unclassified_Bacteria | unclassified_Bacteria |  |  |
| 0   | 0   | 0   | 0   | 0   | 0   | 0   | 29  | 0   | 0   | 0   | 0        | Bacteria         | Desulfobacterota | Desulfurimonada       | Bradyrhodospirillales | Bradyrhodospirillales | unclassified_Bacteria | unclassified_Bacteria |  |  |
| 0   | 0   | 0   | 0   | 0   | 0   | 0   | 0   | 0   | 0   | 0   | 0        | Bacteria         | Desulfobacterota | Desulfurimonada       | Bradyrhodospirillales | Bradyrhodospirillales | unclassified_Bacteria | unclassified_Bacteria |  |  |
| 0   | 0   | 0   | 0   | 0   | 29  | 0   | 0   | 36  | 0   | 0   | 0        | Bacteria         | Desulfobacterota | Desulfurimonada       | Bradyrhodospirillales | Bradyrhodospirillales | unclassified_Bacteria | unclassified_Bacteria |  |  |
| 0   | 0   | 0   | 0   | 0   | 0   | 20  | 0   | 0   | 0   | 0   | 0        | Bacteria         | Desulfobacterota | Desulfurimonada       | Bradyrhodospirillales | Bradyrhodospirillales | unclassified_Bacteria | unclassified_Bacteria |  |  |
| 0   | 0   | 0   | 0   | 0   | 0   | 0   | 0   | 0   | 0   | 0   | 0        | Bacteria         | Desulfobacterota | Desulfurimonada       | Bradyrhodospirillales | Bradyrhodospirillales | unclassified_Bacteria | unclassified_Bacteria |  |  |
| 0   | 0   | 0   | 0   | 0   | 0   | 0   | 0   | 0   | 0   | 0   | 0        | Bacteria         | Desulfobacterota | Desulfurimonada       | Bradyrhodospirillales | Bradyrhodospirillales | unclassified_Bacteria | unclassified_Bacteria |  |  |
| 0   | 0   | 0   | 0   | 0   | 0   | 0   | 0   | 0   | 0   | 0   | 0        | Bacteria         | Desulfobacterota | Desulfurimonada       | Bradyrhodospirillales | Bradyrhodospirillales | unclassified_Bacteria | unclassified_Bacteria |  |  |
| 0   | 0   | 0   | 0   | 0   | 0   | 0   | 0   | 0   | 0   | 0   | 0        | Bacteria         | Desulfobacterota | Desulfurimonada       | Bradyrhodospirillales | Bradyrhodospirillales | unclassified_Bacteria | unclassified_Bacteria |  |  |
| 0   | 0   | 0   | 0   | 0   | 0   | 0   | 0   | 0   | 0   | 0   | 0        | Bacteria         | Desulfobacterota | Desulfurimonada       | Bradyrhodospirillales | Bradyrhodospirillales | unclassified_Bacteria | unclassified_Bacteria |  |  |
| 0   | 0   | 0   | 0   | 0   | 0   | 0   | 0   | 0   | 0   | 0   | 0        | Bacteria         | Desulfobacterota | Desulfurimonada       | Bradyrhodospirillales | Bradyrhodospirillales | unclassified_Bacteria | unclassified_Bacteria |  |  |
| 0   | 0   | 0   | 0   | 0   | 0   | 0   | 0   | 0   | 0   | 0   | 0        | Bacteria         | Desulfobacterota | Desulfurimonada       | Bradyrhodospirillales | Bradyrhodospirillales | unclassified_Bacteria | unclassified_Bacteria |  |  |
| 0   | 0   | 0   | 0   | 0   | 0   | 0   | 0   | 0   | 0   | 0   | 0        | Bacteria         | Desulfobacterota | Desulfurimonada       | Bradyrhodospirillales | Bradyrhodospirillales | unclassified_Bacteria | unclassified_Bacteria |  |  |
| 0   | 0   | 0   | 0   | 0   | 0   | 0   | 0   | 0   | 0   | 0   | 0        | Bacteria         | Desulfobacterota | Desulfurimonada       | Bradyrhodospirillales | Bradyrhodospirillales | unclassified_Bacteria | unclassified_Bacteria |  |  |
| 0   | 0   | 0   | 0   | 0   | 0   | 0   | 0   | 0   | 0   | 0   | 0        | Bacteria         | Desulfobacterota | Desulfurimonada       | Bradyrhodospirillales | Bradyrhodospirillales | unclassified_Bacteria | unclassified_Bacteria |  |  |
| 0   | 0   | 0   | 0   | 0   | 0   | 0   | 0   | 0   | 0   | 0   | 0        | Bacteria         | Desulfobacterota | Desulfurimonada       | Bradyrhodospirillales | Bradyrhodospirillales | unclassified_Bacteria | unclassified_Bacteria |  |  |
| 0   | 0   | 0   | 0   | 0   | 0   | 0   | 0   | 0   | 0   | 0   | 0        | Bacteria         | Desulfobacterota | Desulfurimonada       | Bradyrhodospirillales | Bradyrhodospirillales | unclassified_Bacteria | unclassified_Bacteria |  |  |
| 0   | 0   | 0   | 0   | 0   | 0   | 0   | 0   | 0   | 0   | 0   | 0        | Bacteria         | Desulfobacterota | Desulfurimonada       | Bradyrhodospirillales | Bradyrhodospirillales | unclassified_Bacteria | unclassified_Bacteria |  |  |
| 0   | 0   | 0   | 0   | 0   | 0   | 0   | 0   | 0   | 0   | 0   | 0        | Bacteria         | Desulfobacterota | Desulfurimonada       | Bradyrhodospirillales | Bradyrhodospirillales | unclassified_Bacteria | unclassified_Bacteria |  |  |
| 0   | 0   | 0   | 0   | 0   | 0   | 0   | 0   | 0   | 0   | 0   | 0        | Bacteria         | Desulfobacterota | Desulfurimonada       | Bradyrhodospirillales | Bradyrhodospirillales | unclassified_Bacteria | unclassified_Bacteria |  |  |
| 0   | 0   | 0   | 0   | 0   | 0   | 0   | 0   | 0   | 0   | 0   | 0        | Bacteria         | Desulfobacterota | Desulfurimonada       | Bradyrhodospirillales | Bradyrhodospirillales | unclassified_Bacteria | unclassified_Bacteria |  |  |
| 0   | 0   | 0   | 0   | 0   | 0   | 0   | 0   | 0   | 0   | 0   | 0        | Bacteria         | Desulfobacterota | Desulfurimonada       | Bradyrhodospirillales | Bradyrhodospirillales | unclassified_Bacteria | unclassified_Bacteria |  |  |
| 0   | 0   | 0   | 0   | 0   | 0   | 0   | 0   | 0   | 0   | 0   | 0        | Bacteria         | Desulfobacterota | Desulfurimonada       | Bradyrhodospirillales | Bradyrhodospirillales | unclassified_Bacteria | unclassified_Bacteria |  |  |
| 0   | 0   | 0   | 0   | 0   | 0   | 0   | 0   | 0   | 0   | 0   | 0        | Bacteria         | Desulfobacterota | Desulfurimonada       | Bradyrhodospirillales | Bradyrhodospirillales | unclassified_Bacteria | unclassified_Bacteria |  |  |
| 0   | 0   | 0   | 0   | 0   | 0   | 0   | 0   | 0   | 0   | 0   | 0        | Bacteria         | Desulfobacterota | Desulfurimonada       | Bradyrhodospirillales | Bradyrhodospirillales | unclassified_Bacteria | unclassified_Bacteria |  |  |
| 0   | 0   | 0   | 0   | 0   | 0   | 0   | 0   | 0   | 0   | 0   | 0        | Bacteria         | Desulfobacterota | Desulfurimonada       | Bradyrhodospirillales | Bradyrhodospirillales | unclassified_Bacteria | unclassified_Bacteria |  |  |
| 0   | 0   | 0   | 0   | 0   | 0   | 0   | 0   | 0   | 0   | 0   | 0        | Bacteria         | Desulfobacterota | Desulfurimonada       | Bradyrhodospirillales | Bradyrhodospirillales | unclassified_Bacteria | unclassified_Bacteria |  |  |
| 0   | 0   | 0   | 0   | 0   | 0   | 0   | 0   | 0   | 0   | 0   | 0        | Bacteria         | Desulfobacterota | Desulfurimonada       | Bradyrhodospirillales | Bradyrhodospirillales | unclassified_Bacteria | unclassified_Bacteria |  |  |
| 0   | 0   | 0   | 0   | 0   | 0   | 0   | 0   | 0   | 0   | 0   | 0        | Bacteria         | Desulfobacterota | Desulfurimonada       | Bradyrhodospirillales | Bradyrhodospirillales | unclassified_Bacteria | unclassified_Bacteria |  |  |
| 0   | 0   | 0   | 0   | 0   | 0   | 0   | 0   | 0   | 0   | 0   | 0        | Bacteria         | Desulfobacterota | Desulfurimonada       | Bradyrhodospirillales | Bradyrhodospirillales | unclassified_Bacteria | unclassified_Bacteria |  |  |
| 0   | 0   | 0   | 0   | 0   | 0   | 0   | 0   | 0   | 0   | 0   | 0        | Bacteria         | Desulfobacterota | Desulfurimonada       | Bradyrhodospirillales | Bradyrhodospirillales | unclassified_Bacteria | unclassified_Bacteria |  |  |
| 0   | 0   | 0   | 0   | 0   | 0   | 0   | 0   | 0   | 0   | 0   | 0        | Bacteria         | Desulfobacterota | Desulfurimonada       | Bradyrhodospirillales | Bradyrhodospirillales | unclassified_Bacteria | unclassified_Bacteria |  |  |
| 0   | 0   | 0   | 0   | 0   | 0   | 0   | 0   | 0   | 0   | 0   | 0        | Bacteria         | Desulfobacterota | Desulfurimonada       | Bradyrhodospirillales | Bradyrhodospirillales | unclassified_Bacteria | unclassified_Bacteria |  |  |
| 0   | 0   | 0   | 0   | 0   | 0   | 0   | 0   | 0   | 0   | 0   | 0        | Bacteria         | Desulfobacterota | Desulfurimonada       | Bradyrhodospirillales | Bradyrhodospirillales | unclassified_Bacteria | unclassified_Bacteria |  |  |
| 0   | 0   | 0   | 0   | 0   | 0   | 0   | 0   | 0   | 0   | 0   | 0        | Bacteria         | Desulfobacterota | Desulfurimonada       | Bradyrhodospirillales | Bradyrhodospirillales | unclassified_Bacteria | unclassified_Bacteria |  |  |
| 0   | 0   | 0   | 0   | 0   | 0   | 0   | 0   | 0   | 0   | 0   | 0        | Bacteria         | Desulfobacterota | Desulfurimonada       | Bradyrhodospirillales | Bradyrhodospirillales | unclassified_Bacteria | unclassified_Bacteria |  |  |
| 0   | 0   | 0   | 0   | 0   | 0   | 0   | 0   | 0   | 0   | 0   | 0        | Bacteria         | Desulfobacterota | Desulfurimonada       | Bradyrhodospirillales | Bradyrhodospirillales | unclassified_Bacteria | unclassified_Bacteria |  |  |
| 0   | 0   | 0   | 0   | 0   | 0   | 0   | 0   | 0   | 0   | 0   | 0        | Bacteria         | Desulfobacterota | Desulfurimonada       | Bradyrhodospirillales | Bradyrhodospirillales | unclassified_Bacteria | unclassified_Bacteria |  |  |
| 0   | 0   | 0   | 0   | 0   | 0   | 0   | 0   | 0   | 0   | 0   | 0        | Bacteria         | Desulfobacterota | Desulfurimonada       | Bradyrhodospirillales | Bradyrhodospirillales | unclassified_Bacteria | unclassified_Bacteria |  |  |
| 0   | 0   | 0   | 0   | 0   | 0   | 0   | 0   | 0   | 0   | 0   | 0        | Bacteria         | Desulfobacterota | Desulfurimonada       | Bradyrhodospirillales | Bradyrhodospirillales | unclassified_Bacteria | unclassified_Bacteria |  |  |
| 0   | 0   | 0   | 0   | 0   | 0   | 0   | 0   | 0   | 0   | 0   | 0        | Bacteria         | Desulfobacterota | Desulfurimonada       | Bradyrhodospirillales | Bradyrhodospirillales | unclassified_Bacteria | unclassified_Bacteria |  |  |
| 0   | 0   | 0   | 0   | 0   | 0   | 0   | 0   | 0   | 0   | 0   | 0        | Bacteria         | Desulfobacterota | Desulfurimonada       | Bradyrhodospirillales | Bradyrhodospirillales | unclassified_Bacteria | unclassified_Bacteria |  |  |
| 0   | 0   | 0   | 0   | 0   | 0   | 0   | 0   | 0   | 0   | 0   | 0        | Bacteria         | Desulfobacterota | Desulfurimonada       | Bradyrhodospirillales | Bradyrhodospirillales | unclassified_Bacteria | unclassified_Bacteria |  |  |
| 0   | 0   | 0   | 0   | 0   | 0   | 0   | 0   | 0   | 0   | 0   | 0        | Bacteria         | Desulfobacterota | Desulfurimonada       | Bradyrhodospirillales | Bradyrhodospirillales | unclassified_Bacteria | unclassified_Bacteria |  |  |
| 0   | 0   | 0   | 0   | 0   | 0   | 0   | 0   | 0   | 0   | 0   | 0        | Bacteria         | Desulfobacterota | Desulfurimonada       | Bradyrhodospirillales | Bradyrhodospirillales | unclassified_Bacteria | unclassified_Bacteria |  |  |
| 0   | 0   | 0   | 0   | 0   | 0   | 0   | 0   | 0   | 0   | 0   | 0        | Bacteria         | Desulfobacterota | Desulfurimonada       | Bradyrhodospirillales | Bradyrhodospirillales | unclassified_Bacteria | unclassified_Bacteria |  |  |
| 0   | 0   | 0   | 0   | 0   | 0   | 0   | 0   | 0   | 0   | 0   | 0        | Bacteria         | Desulfobacterota | Desulfurimonada       | Bradyrhodospirillales | Bradyrhodospirillales | unclassified_Bacteria | unclassified_Bacteria |  |  |
| 0   | 0   | 0   | 0   | 0   | 0   | 0   | 0   | 0   | 0   | 0   | 0        | Bacteria         | Desulfobacterota | Desulfurimonada       | Bradyrhodospirillales | Bradyrhodospirillales | unclassified_Bacteria | unclassified_Bacteria |  |  |
| 0   | 0   | 0   | 0   | 0   | 0   | 0   | 0   | 0   | 0   | 0   | 0        | Bacteria         | Desulfobacterota | Desulfurimonada       | Bradyrhodospirillales | Bradyrhodospirillales | unclassified_Bacteria | unclassified_Bacteria |  |  |
| 0   | 0   | 0   | 0   | 0   | 0   | 0   | 0   | 0   | 0   | 0   | 0        | Bacteria         | Desulfobacterota | Desulfurimonada       | Bradyrhodospirillales | Bradyrhodospirillales | unclassified_Bacteria | unclassified_Bacteria |  |  |
| 0   | 0   | 0   | 0   | 0   | 0   | 0   | 0   | 0   | 0   | 0   | 0        | Bacteria         | Desulfobacterota | Desulfurimonada       | Bradyrhodospirillales | Bradyrhodospirillales | unclassified_Bacteria | unclassified_Bacteria |  |  |
| 0   | 0   | 0   | 0   | 0   | 0   | 0   | 0   | 0   | 0   | 0   | 0        | Bacteria         | Desulfobacterota | Desulfurimonada       | Bradyrhodospirillales | Bradyrhodospirillales | unclassified_Bacteria | unclassified_Bacteria |  |  |
| 0   | 0   | 0   | 0   | 0   | 0   | 0   | 0   | 0   | 0   | 0   | 0        | Bacteria         | Desulfobacterota | Desulfurimonada       | Bradyrhodospirillales | Bradyrhodospirillales | unclassified_Bacteria | unclassified_Bacteria |  |  |
| 0   | 0   | 0   | 0   | 0   | 0   | 0   | 0   | 0   | 0   | 0   | 0        | Bacteria         | Desulfobacterota | Desulfurimonada       | Bradyrhodospirillales | Bradyrhodospirillales | unclassified_Bacteria | unclassified_Bacteria |  |  |
| 0   |     |     |     |     |     |     |     |     |     |     |          |                  |                  |                       |                       |                       |                       |                       |  |  |

[illegible]

[illegible]

|     |     |     |      |     |     |     |     |     |     |     |    |    |             |                     |                       |                        |                       |                            |                     |          |  |
|-----|-----|-----|------|-----|-----|-----|-----|-----|-----|-----|----|----|-------------|---------------------|-----------------------|------------------------|-----------------------|----------------------------|---------------------|----------|--|
|     | 0   | 0   | 0    | 236 | 60  | 0   | 0   | 0   | 0   | 0   | 0  | 0  | 0           | Bacteria            | Proteobacteria        | Rhodobacteriales       | Rhodobacteriales      | Haloarubrobacterium        | Haloarubrobacterium | sp.      |  |
| 0   | 0   | 0   | 0    | 0   | 0   | 0   | 0   | 0   | 47  | 37  | 0  | 41 | 30 Bacteria | Gammaproteobacteria | Ectothiorhodospirales | Ectothiorhodospiraceae | Haliiflum             | Haliiflum                  | sp.                 |          |  |
| 0   | 0   | 0   | 0    | 0   | 0   | 0   | 0   | 0   | 0   | 0   | 73 | 67 | 70 Bacteria | Proteobacteria      | Ectothiorhodospirales | Ectothiorhodospiraceae | Haliiflum             | Haliiflum                  | sp.                 |          |  |
| 0   | 0   | 0   | 135  | 0   | 0   | 0   | 0   | 0   | 0   | 0   | 0  | 0  | 0           | Bacteria            | Oxasporifilales       | Haliomonadales         | Haliomonadales        | Mariococcus                | sp.                 | F322     |  |
| 0   | 0   | 0   | 207  | 18  | 0   | 0   | 0   | 0   | 0   | 0   | 8  | 14 | 0           | Bacteria            | Oxasporifilales       | Haliomonadales         | Haliomonadales        | Haliomonas                 | sp.                 |          |  |
| 0   | 0   | 0   | 0    | 0   | 0   | 0   | 0   | 0   | 0   | 0   | 0  | 0  | 0           | Bacteria            | Caulobacteriales      | Heliobacteriales       | Heliobacteriales      | Heliobacter                | sp.                 |          |  |
| 0   | 0   | 0   | 128  | 69  | 0   | 0   | 0   | 0   | 0   | 0   | 0  | 0  | 0           | Bacteria            | Altenomonadales       | Isonomiales            | Isonomiales           | Isonomia                   | sp.                 |          |  |
| 0   | 0   | 0   | 0    | 0   | 0   | 0   | 0   | 0   | 0   | 0   | 0  | 0  | 0           | Bacteria            | Altenomonadales       | Isonomiales            | Isonomiales           | Isonomia                   | sp.                 | z061l    |  |
| 0   | 0   | 0   | 0    | 0   | 0   | 0   | 0   | 0   | 0   | 13  | 0  | 14 | 0           | Bacteria            | Gammaproteobacteria   | Serratobacteriales     | Weissella             | JT825 marine benthic group | Kangella            | sp.      |  |
| 0   | 0   | 0   | 0    | 0   | 0   | 0   | 0   | 0   | 0   | 0   | 0  | 0  | 0           | Bacteria            | Gammaproteobacteria   | Oxasporifilales        | Kangellaceae          | Kangella                   | sp.                 |          |  |
| 0   | 0   | 0   | 0    | 71  | 0   | 0   | 0   | 0   | 0   | 0   | 0  | 0  | 0           | Bacteria            | Rhodobacteriales      | Rhodobacteriales       | Rhodobacteriales      | Limbacium                  | sp.                 |          |  |
| 0   | 22  | 0   | 82   | 0   | 0   | 0   | 0   | 0   | 0   | 0   | 0  | 31 | 0           | Bacteria            | Rhodobacteriales      | Rhodobacteriales       | Rhodobacteriales      | Limbacium                  | sp.                 |          |  |
| 0   | 0   | 0   | 0    | 0   | 0   | 124 | 0   | 0   | 0   | 0   | 0  | 41 | 0           | Bacteria            | Rhodobacteriales      | Rhodobacteriales       | Rhodobacteriales      | Limbacium                  | sp.                 |          |  |
| 0   | 0   | 0   | 0    | 62  | 0   | 0   | 0   | 0   | 0   | 0   | 0  | 18 | 0           | Bacteria            | Rhodobacteriales      | Rhodobacteriales       | Rhodobacteriales      | Limbacium                  | sp.                 |          |  |
| 0   | 0   | 0   | 0    | 32  | 0   | 0   | 0   | 0   | 0   | 0   | 0  | 0  | 0           | Bacteria            | Caulobacteriales      | Heliobacteriales       | Heliobacteriales      | Limbacium                  | sp.                 |          |  |
| 0   | 0   | 0   | 0    | 0   | 0   | 0   | 0   | 0   | 0   | 16  | 0  | 0  | 0           | Bacteria            | Gammaproteobacteria   | Rhodospirillales       | Magnetospirillales    | Magnetospira               | sp.                 |          |  |
| 82  | 0   | 0   | 0    | 0   | 0   | 0   | 0   | 0   | 0   | 0   | 0  | 0  | 0           | Bacteria            | Rhodobacteriales      | Rhodobacteriales       | Rhodobacteriales      | Mariella                   | sp.                 |          |  |
| 0   | 0   | 0   | 0    | 0   | 0   | 0   | 0   | 0   | 0   | 0   | 0  | 0  | 0           | Bacteria            | Rhodobacteriales      | Rhodobacteriales       | Rhodobacteriales      | Mariella                   | sp.                 |          |  |
| 147 | 222 | 444 | 127  | 99  | 72  | 0   | 106 | 0   | 193 | 0   | 62 | 2  | 0           | Bacteria            | Gammaproteobacteria   | Altenomonadales        | Marinobacteriales     | Marinobacter               | sp.                 | W06-1    |  |
| 0   | 0   | 0   | 1623 | 0   | 0   | 0   | 0   | 0   | 0   | 0   | 0  | 15 | 0           | Bacteria            | Gammaproteobacteria   | Altenomonadales        | Marinobacteriales     | Marinobacter               | sp.                 |          |  |
| 0   | 0   | 0   | 30   | 0   | 0   | 0   | 0   | 0   | 0   | 0   | 0  | 0  | 0           | Bacteria            | Gammaproteobacteria   | Oxasporifilales        | Marinobacteriales     | Marinobacter               | sp.                 | A652     |  |
| 0   | 0   | 0   | 84   | 0   | 0   | 0   | 0   | 0   | 0   | 0   | 0  | 0  | 0           | Bacteria            | Gammaproteobacteria   | Oxasporifilales        | Marinobacteriales     | Marinobacter               | sp.                 |          |  |
| 8   | 0   | 0   | 0    | 0   | 0   | 0   | 22  | 19  | 0   | 0   | 0  | 19 | 0           | Bacteria            | Rhodobacteriales      | Rhodobacteriales       | Tetrasphaerellales    | Marivibrio                 | halodurans          |          |  |
| 0   | 13  | 0   | 0    | 0   | 0   | 0   | 0   | 0   | 0   | 42  | 0  | 43 | 0           | Bacteria            | Rhodobacteriales      | Rhodobacteriales       | Marivibrio            | Marivibrio                 | sp.                 |          |  |
| 0   | 0   | 0   | 0    | 0   | 0   | 0   | 0   | 0   | 0   | 0   | 0  | 0  | 0           | Bacteria            | Rhodobacteriales      | Rhodobacteriales       | Methylohalobacter     | Methylohalobacter          | sp.                 |          |  |
| 0   | 0   | 39  | 0    | 0   | 0   | 0   | 0   | 0   | 0   | 0   | 0  | 0  | 0           | Bacteria            | Nitrospirillales      | Methylophilales        | Methylophilales       | Methylophilus              | sp.                 |          |  |
| 0   | 77  | 77  | 0    | 0   | 0   | 0   | 0   | 0   | 0   | 36  | 0  | 0  | 0           | Bacteria            | Gammaproteobacteria   | unclassified_Bacteria  | unclassified_Bacteria | Mitrospira                 | sp.                 |          |  |
| 0   | 0   | 0   | 0    | 0   | 0   | 0   | 37  | 0   | 0   | 0   | 0  | 0  | 0           | Bacteria            | Gammaproteobacteria   | Nitrospirillales       | Nitrospirillales      | Nitrospirillum             | sp.                 |          |  |
| 24  | 32  | 80  | 80   | 20  | 0   | 0   | 0   | 41  | 87  | 37  | 0  | 0  | 0           | Bacteria            | Caulobacteriales      | Caulobacteriales       | Hyphomicrobiales      | Oceanicella                | sp.                 |          |  |
| 0   | 0   | 0   | 0    | 0   | 0   | 0   | 29  | 0   | 0   | 0   | 0  | 0  | 0           | Bacteria            | Rhodobacteriales      | Caulobacteriales       | Hyphomicrobiales      | Oceanicella                | sp.                 |          |  |
| 0   | 80  | 0   | 49   | 0   | 37  | 0   | 0   | 0   | 19  | 0   | 0  | 0  | 0           | Bacteria            | Rhodobacteriales      | Caulobacteriales       | Hyphomicrobiales      | Oceanicella                | sp.                 |          |  |
| 0   | 0   | 0   | 147  | 0   | 0   | 0   | 0   | 0   | 0   | 0   | 0  | 0  | 0           | Bacteria            | Gammaproteobacteria   | Oxasporifilales        | Oxasporifilales       | Oxasporillum               | sp.                 |          |  |
| 0   | 0   | 58  | 0    | 0   | 0   | 0   | 0   | 0   | 0   | 0   | 0  | 0  | 0           | Bacteria            | Rhodobacteriales      | Rhodobacteriales       | Rhodobacteriales      | Palenaia-Pseudonitrospira  | sp.                 | A14      |  |
| 0   | 0   | 0   | 0    | 0   | 0   | 0   | 0   | 27  | 0   | 0   | 0  | 0  | 0           | Bacteria            | Alphaproteobacteria   | Caulobacteriales       | Parvulariales         | Parvularia                 | sp.                 |          |  |
| 0   | 0   | 0   | 0    | 0   | 0   | 0   | 62  | 62  | 56  | 79  | 24 | 24 | 0           | Bacteria            | Alphaproteobacteria   | Caulobacteriales       | Parvulariales         | Parvularia                 | sp.                 |          |  |
| 0   | 0   | 0   | 0    | 0   | 0   | 0   | 36  | 0   | 0   | 0   | 0  | 0  | 0           | Bacteria            | Alphaproteobacteria   | Caulobacteriales       | Parvulariales         | Parvularia                 | sp.                 | TAA-29   |  |
| 0   | 0   | 0   | 71   | 0   | 0   | 0   | 0   | 0   | 0   | 0   | 0  | 0  | 0           | Bacteria            | Alphaproteobacteria   | Caulobacteriales       | Parvulariales         | Parvularia                 | sp.                 |          |  |
| 0   | 0   | 47  | 0    | 0   | 0   | 0   | 0   | 0   | 0   | 0   | 0  | 0  | 0           | Bacteria            | Gammaproteobacteria   | Altenomonadales        | Pseudomonadales       | Pseudomonas                | marina              |          |  |
| 0   | 0   | 0   | 76   | 17  | 0   | 0   | 0   | 0   | 0   | 0   | 0  | 0  | 0           | Bacteria            | Gammaproteobacteria   | Altenomonadales        | Pseudomonadales       | Pseudomonas                | sp.                 |          |  |
| 0   | 26  | 0   | 0    | 0   | 0   | 20  | 0   | 0   | 42  | 0   | 0  | 0  | 0           | Bacteria            | Gammaproteobacteria   | Oxasporifilales        | Pseudohongellales     | Pseudohongella             | sp.                 |          |  |
| 11  | 8   | 8   | 0    | 0   | 0   | 0   | 0   | 0   | 0   | 0   | 0  | 0  | 0           | Bacteria            | Gammaproteobacteria   | Oxasporifilales        | Pseudohongellales     | Pseudohongella             | sp.                 | DS1301   |  |
| 0   | 24  | 0   | 0    | 29  | 0   | 0   | 0   | 0   | 0   | 0   | 0  | 0  | 0           | Bacteria            | Gammaproteobacteria   | Oxasporifilales        | Pseudohongellales     | Pseudohongella             | sp.                 |          |  |
| 0   | 0   | 12  | 0    | 0   | 0   | 0   | 0   | 0   | 10  | 0   | 0  | 0  | 0           | Bacteria            | Gammaproteobacteria   | Oxasporifilales        | Pseudohongellales     | Pseudohongella             | sp.                 | jeppicum |  |
| 0   | 0   | 0   | 0    | 0   | 0   | 0   | 0   | 0   | 0   | 0   | 0  | 0  | 0           | Bacteria            | Alphaproteobacteria   | Rhodospirillales       | Rhodospirillales      | Rhodospirillum             | sp.                 |          |  |
| 0   | 0   | 0   | 0    | 15  | 0   | 0   | 0   | 0   | 0   | 0   | 0  | 0  | 0           | Bacteria            | Alphaproteobacteria   | Rhodospirillales       | Rhodospirillales      | Rhodospirillum             | sp.                 |          |  |
| 71  | 158 | 42  | 71   | 158 | 109 | 82  | 109 | 577 | 402 | 136 | 0  | 0  | 0           | Bacteria            | Alphaproteobacteria   | Rhodospirillales       | Rhodospirillales      | Rhodospirillum             | sp.                 |          |  |
| 0   | 0   | 0   | 68   | 0   | 0   | 113 | 64  | 37  | 53  | 42  | 0  | 0  | 0           | Bacteria            | Alphaproteobacteria   | Rhodospirillales       | Rhodospirillales      | Rhodospirillum             | sp.                 | 2M61     |  |
| 0   | 0   | 18  | 0    | 22  | 0   | 0   | 0   | 17  | 0   | 0   | 0  | 0  | 0           | Bacteria            | Alphaproteobacteria   | Rhodospirillales       | Rhodospirillales      | Rhodospirillum             | sp.                 |          |  |
| 59  | 54  | 0   | 0    | 0   | 0   | 0   | 0   | 7   | 0   | 22  | 0  | 0  | 0           | Bacteria            | Alphaproteobacteria   | Rhodospirillales       | Rhodospirillales      | Rhodospirillum             | sp.                 | 23A21    |  |
| 0   | 0   | 0   | 0    | 0   | 32  | 92  | 183 | 0   | 31  | 2   | 0  | 0  | 0           | Bacteria            | Alphaproteobacteria   | Rhodospirillales       | Rhodospirillales      | Rhodospirillum             | sp.                 |          |  |
| 0   | 0   | 0   | 0    | 0   | 0   | 0   | 0   | 0   | 42  | 0   | 0  | 0  | 0           | Bacteria            | Alphaproteobacteria   | Rhodospirillales       | Rhodospirillales      | Rhodospirillum             | sp.                 |          |  |
| 0   | 0   | 30  | 0    | 0   | 0   | 0   | 0   | 0   | 0   | 0   | 0  | 0  | 0           | Bacteria            | Alphaproteobacteria   | Rhodospirillales       | Rhodospirillales      | Rhodospirillum             | sp.                 |          |  |
| 0   | 0   | 0   | 0    | 0   | 0   | 0   | 0   | 0   | 0   | 0   | 0  | 0  | 0           | Bacteria            | Alphaproteobacteria   | Rhodospirillales       | Rhodospirillales      | Rhodospirillum             | sp.                 |          |  |
| 0   | 0   | 38  | 0    | 0   | 0   | 0   | 0   | 0   | 0   | 0   | 0  | 0  | 0           | Bacteria            | Alphaproteobacteria   | Rhodospirillales       | Rhodospirillales      | Rhodospirillum             | sp.                 |          |  |
| 0   | 52  | 0   | 78   | 0   | 0   | 0   | 0   | 16  | 0   | 0   | 0  | 0  | 0           | Bacteria            | Alphaproteobacteria   | Rhodospirillales       | Rhodospirillales      | Rhodospirillum             | sp.                 |          |  |
| 0   | 0   | 0   | 0    | 0   | 0   | 0   | 94  | 12  | 0   | 0   | 0  | 0  | 0           | Bacteria            | Gammaproteobacteria   | Oxasporifilales        | Saccharosporillales   | Saccharosporillum          | sp.                 |          |  |
| 42  | 0   | 0   | 0    | 0   | 0   | 0   | 0   | 0   | 0   | 0   | 0  | 0  | 0           | Bacteria            | Gammaproteobacteria   | Oxasporifilales        | Saccharosporillales   | Saccharosporillum          | sp.                 | ae04v1   |  |
| 0   | 0   | 0   | 0    | 0   | 0   | 0   | 0   | 0   | 0   | 0   | 0  | 0  | 0           | Bacteria            | Gammaproteobacteria   | Oxasporifilales        | Saccharosporillales   | Saccharosporillum          | sp.                 | z061l    |  |
| 0   | 0   | 0   | 0    | 0   | 0   | 32  | 11  | 0   | 24  | 2   | 0  | 0  | 0           | Bacteria            | Alphaproteobacteria   | Rhodospirillales       | Rhodospirillales      | Rhodospirillum             | sp.                 |          |  |
| 0   | 0   | 77  | 0    | 80  | 0   | 0   | 0   | 0   | 0   | 0   | 0  | 0  | 0           | Bacteria            | Altenomonadales       | Salinivibrionales      | Salinivibrionales     | Salinivibrio               | sp.                 | HF8227   |  |
| 9   | 27  | 0   | 0    | 0   | 0   | 0   | 0   | 0   | 0   | 0   | 0  | 0  | 0           | Bacteria            | Gammaproteobacteria   | Salinivibrionales      | Salinivibrionales     | Salinivibrio               | sp.                 |          |  |
| 0   | 0   | 0   | 70   | 0   | 0   | 0   | 0   | 0   | 0   | 0   | 0  | 0  | 0           | Bacteria            | Gammaproteobacteria   | Salinivibrionales      | Salinivibrionales     | Salinivibrio               | sp.                 |          |  |
| 0   | 0   | 0   | 0    | 0   | 0   | 15  | 0   | 0   | 0   | 0   | 0  | 0  | 0           | Bacteria            | Alphaproteobacteria   | Salinivibrionales      | Salinivibrionales     | Salinivibrio               | sp.                 |          |  |
| 0   | 0   | 24  | 0    | 0   | 0   | 0   | 0   | 14  | 0   | 0   | 0  | 0  | 0           | Bacteria            | Alphaproteobacteria   | Salinivibrionales      | Salinivibrionales     | Salinivibrio               | sp.                 |          |  |
| 0   | 0   | 0   | 0    | 0   | 0   | 9   | 0   | 0   | 0   | 0   | 0  | 0  | 0           | Bacteria            | Alphaproteobacteria   | Salinivibrionales      | Salinivibrionales     | Salinivibrio               | sp.                 |          |  |
| 0   | 37  | 0   | 0    | 0   | 0   | 0   | 0   | 0   | 0   | 0   | 0  | 0  | 0           | Bacteria            | Gammaproteobacteria   | Oxasporifilales        | Salinivibrionales     | Salinivibrio               | sp.                 |          |  |
| 0   | 0   | 0   | 0    | 0   | 0   | 0   | 0   | 0   | 0   | 0   | 0  | 0  | 0           | Bacteria            | Gammaproteobacteria   | Oxasporifilales        | Salinivibrionales     | Salinivibrio               | sp.                 |          |  |
| 0   | 0   | 0   | 0    | 62  | 0   | 0   | 0   | 0   | 0   | 0   | 0  | 0  | 0           | Bacteria            | Gammaproteobacteria   | Oxasporifilales        | Salinivibrionales     | Salinivibrio               | sp.                 |          |  |
| 0   | 0   | 0   | 0    | 0   | 0   | 0   | 0   | 0   | 0   | 0   | 0  | 0  | 0           | Bacteria            | Gammaproteobacteria   | Oxasporifilales        | Salinivibrionales     | Salinivibrio               | sp.                 |          |  |
| 0   | 0   | 0   | 0    | 8   | 16  | 0   | 0   | 16  | 0   | 0   | 0  | 0  | 0           | Bacteria            | Gammaproteobacteria   | Oxasporifilales        | Salinivibrionales     | Salinivibrio               | sp.                 |          |  |
| 0   | 0   | 0   | 0    | 0   | 0   | 0   | 0   | 0   | 0   | 0   | 0  | 0  | 0           | Bacteria            | Gammaproteobacteria   | Oxasporifilales        | Salinivibrionales     | Salinivibrio               | sp.                 |          |  |
| 0   | 0   | 79  | 0    | 0   | 0   | 0   | 0   | 0   | 0   | 0   | 0  | 0  | 0           | Bacteria            | Gammaproteobacteria   | Oxasporifilales        | Salinivibrionales     | Salinivibrio               | sp.                 |          |  |
| 0   | 34  | 0   | 0    | 0   | 0   | 0   | 0   | 0   | 0   | 0   | 0  | 0  | 0           | Bacteria            | Gammaproteobacteria   | Oxasporifilales        | Salinivibrionales     | Salinivibrio               | sp.                 |          |  |
| 0   | 0   | 31  | 0    | 0   | 0   | 0   | 0   | 0   | 0   | 0   | 0  | 0  | 0           | Bacteria            | Gammaproteobacteria   | Oxasporifilales        | Salinivibrionales     | Salinivibrio               | sp.                 |          |  |
| 0   | 0   | 33  | 0    | 0   | 0   | 0   | 0   | 0   | 0   | 0   | 0  | 0  | 0           | Bacteria            | Gammaproteobacteria   | Oxasporifilales        | Salinivibrionales     | Salinivibrio               | sp.                 |          |  |
| 0   | 48  | 0   | 0    | 0   | 0   | 0   | 0   | 0   | 0   | 0   | 0  | 0  | 0           | Bacteria            | Gammaproteobacteria   | Oxasporifilales        | Salinivibrionales     | Salinivibrio               | sp.                 |          |  |
| 0   | 0   | 62  | 0    | 0   | 0   | 0   | 0   | 0   | 0   | 0   | 0  | 0  | 0           | Bacteria            | Gammaproteobacteria   | Oxasporifilales        | Salinivibrionales     | Salinivibrio               | sp.                 |          |  |
| 0   | 99  | 0   | 99   | 0   | 0   | 0   | 0   | 0   | 0   | 0   | 0  | 0  | 0           | Bacteria            | Gammaproteobacteria   | Oxasporifilales        | Salinivibrionales     | Salinivibrio               | sp.                 |          |  |
| 284 | 177 | 91  | 0    | 87  | 39  | 62  | 168 | 82  | 0   | 61  | 32 | 2  | 0           | Bacteria            | Gammaproteobacteria   | Oxasporifilales        | Salinivibrionales     | Salinivibrio               | sp.                 |          |  |
| 0   | 0   | 48  | 0    | 0   | 0   | 0   | 0   | 0   | 0   | 0   | 0  | 0  | 0           | Bacteria            | Gammaproteobacteria   | Oxasporifilales        | Salinivibrionales     | Salinivibrio               | sp.                 |          |  |
| 0   | 0   | 0   | 0    | 0   | 0   | 0   | 0   | 0   | 0   | 0   | 0  | 0  | 0           | Bacteria            | Gammaproteobacteria   | Oxasporifilales        | Salinivibrionales     | Salinivibrio               | sp.                 |          |  |
| 0   | 0   | 0   | 0    | 0   | 0   | 0   | 0   | 0   | 0   | 0   | 0  | 0  | 0           | Bacteria            | Gammaproteobacteria   | Oxasporifilales        | Salinivibrionales     | Salinivibrio               | sp.                 |          |  |
| 0   | 18  | 0   | 0    | 0   | 0   | 0   | 0   | 0   | 0   | 0   | 0  | 0  | 0           | Bacteria            | Gammaproteobacteria   | Oxasporifilales        | Salinivibrionales     | Salinivibrio               | sp.                 |          |  |
| 0   | 0   | 0   | 0    | 0   | 0   | 0   | 0   | 0   | 0   | 0   | 0  | 0  | 0           | Bacteria            | Gammaproteobacteria   | Oxasporifilales        | Salinivibrionales     | Salinivibrio               | sp.                 |          |  |
| 0   | 0   | 0   | 0    | 0   | 0   | 0   | 0   | 0   | 0   | 0   | 0  | 0  | 0           | Bacteria            | Gammaproteobacteria   | Oxasporif              |                       |                            |                     |          |  |

|    |     |    |     |     |     |     |     |     |     |     |          |                |                             |                             |                           |                       |  |  |  |  |
|----|-----|----|-----|-----|-----|-----|-----|-----|-----|-----|----------|----------------|-----------------------------|-----------------------------|---------------------------|-----------------------|--|--|--|--|
| 0  | 0   | 0  | 0   | 0   | 0   | 15  | 0   | 0   | 0   | 0   | Bacteria | Proteobacteria | Alphaproteobacteria         | Rhodospirillales            | Magnetospiraceae          |                       |  |  |  |  |
| 0  | 0   | 0  | 0   | 0   | 0   | 9   | 0   | 0   | 0   | 0   | Bacteria | Proteobacteria | Alphaproteobacteria         | Rhodospirillales            | Magnetospiraceae          |                       |  |  |  |  |
| 0  | 0   | 0  | 0   | 0   | 0   | 6   | 0   | 0   | 0   | 0   | Bacteria | Proteobacteria | Alphaproteobacteria         | Rhodospirillales            | Rhodospirillaceae         |                       |  |  |  |  |
| 0  | 0   | 0  | 0   | 0   | 12  | 0   | 0   | 0   | 0   | 0   | Bacteria | Proteobacteria | Alphaproteobacteria         | Rhodospirillales            | unclassified_Bacteria     |                       |  |  |  |  |
| 0  | 0   | 0  | 0   | 0   | 0   | 482 | 0   | 0   | 0   | 0   | Bacteria | Proteobacteria | Alphaproteobacteria         | Rhodospirillales            | unclassified_Bacteria     |                       |  |  |  |  |
| 0  | 11  | 0  | 6   | 5   | 0   | 0   | 0   | 0   | 0   | 9   | Bacteria | Proteobacteria | Alphaproteobacteria         | Rhodospirillales            | unclassified_Bacteria     |                       |  |  |  |  |
| 0  | 0   | 0  | 6   | 14  | 0   | 0   | 0   | 52  | 75  | 0   | Bacteria | Proteobacteria | Alphaproteobacteria         | Rhodospirillales            | unclassified_Bacteria     |                       |  |  |  |  |
| 0  | 0   | 0  | 26  | 0   | 0   | 0   | 0   | 0   | 0   | 0   | Bacteria | Proteobacteria | Alphaproteobacteria         | Richthofiales               | Anaplasmataceae           |                       |  |  |  |  |
| 0  | 0   | 0  | 18  | 0   | 0   | 0   | 0   | 0   | 0   | 0   | Bacteria | Proteobacteria | Alphaproteobacteria         | Richthofiales               | Fabaceae                  |                       |  |  |  |  |
| 0  | 0   | 0  | 7   | 0   | 0   | 0   | 0   | 0   | 0   | 0   | Bacteria | Proteobacteria | Alphaproteobacteria         | Richthofiales               | unclassified_Bacteria     |                       |  |  |  |  |
| 47 | 0   | 0  | 7   | 0   | 0   | 0   | 0   | 0   | 0   | 0   | Bacteria | Proteobacteria | Gammaproteobacteria         | Run SP54                    | unclassified_Bacteria     |                       |  |  |  |  |
| 31 | 165 | 0  | 88  | 70  | 29  | 96  | 0   | 0   | 0   | 132 | Bacteria | Proteobacteria | Alphaproteobacteria         | Sphingomonadales            | Sphingomonadaceae         |                       |  |  |  |  |
| 0  | 0   | 0  | 0   | 65  | 80  | 34  | 34  | 50  | 30  | 0   | 82       | Bacteria       | Proteobacteria              | Alphaproteobacteria         | Thalassobacillales        | unclassified_Bacteria |  |  |  |  |
| 0  | 0   | 0  | 0   | 0   | 0   | 0   | 0   | 0   | 0   | 0   | 32       | Bacteria       | Proteobacteria              | Alphaproteobacteria         | Thalassobacillales        | unclassified_Bacteria |  |  |  |  |
| 0  | 0   | 0  | 21  | 0   | 41  | 0   | 100 | 115 | 58  | 119 | 71       | Bacteria       | Proteobacteria              | Alphaproteobacteria         | Thalassobacillales        | unclassified_Bacteria |  |  |  |  |
| 0  | 0   | 0  | 26  | 0   | 0   | 0   | 0   | 0   | 0   | 0   | 0        | Bacteria       | Proteobacteria              | Gammaproteobacteria         | Thaumogymnates            | Thaumogymnataceae     |  |  |  |  |
| 0  | 29  | 0  | 0   | 0   | 0   | 0   | 0   | 0   | 0   | 0   | 0        | Bacteria       | Proteobacteria              | Gammaproteobacteria         | Thiotrichales             | Thiotrichaceae        |  |  |  |  |
| 21 | 0   | 0  | 0   | 0   | 0   | 0   | 0   | 0   | 0   | 0   | 0        | Bacteria       | Proteobacteria              | Gammaproteobacteria         | Thiotrichales             | Thiotrichaceae        |  |  |  |  |
| 15 | 0   | 0  | 0   | 0   | 0   | 0   | 0   | 0   | 0   | 0   | 0        | Bacteria       | Proteobacteria              | Alphaproteobacteria         | Tissotiales               | Gemmatimonadaceae     |  |  |  |  |
| 0  | 113 | 0  | 0   | 0   | 12  | 13  | 21  | 0   | 0   | 6   | 0        | Bacteria       | Proteobacteria              | Alphaproteobacteria         | Tissotiales               | Gemmatimonadaceae     |  |  |  |  |
| 0  | 0   | 0  | 0   | 0   | 0   | 0   | 0   | 0   | 0   | 0   | 0        | Bacteria       | Proteobacteria              | Alphaproteobacteria         | Tissotiales               | Gemmatimonadaceae     |  |  |  |  |
| 0  | 0   | 0  | 19  | 0   | 0   | 0   | 0   | 0   | 0   | 0   | 0        | Bacteria       | Proteobacteria              | Alphaproteobacteria         | unclassified_Bacteria     |                       |  |  |  |  |
| 37 | 2   | 0  | 393 | 46  | 29  | 14  | 104 | 76  | 28  | 69  | 61       | Bacteria       | Proteobacteria              | Alphaproteobacteria         | unclassified_Bacteria     |                       |  |  |  |  |
| 76 | 0   | 34 | 35  | 0   | 0   | 0   | 0   | 0   | 0   | 0   | 0        | Bacteria       | Proteobacteria              | Gammaproteobacteria         | unclassified_Bacteria     |                       |  |  |  |  |
| 0  | 0   | 0  | 0   | 0   | 0   | 5   | 0   | 0   | 0   | 0   | 0        | Bacteria       | Proteobacteria              | Gammaproteobacteria         | unclassified_Bacteria     |                       |  |  |  |  |
| 25 | 136 | 61 | 389 | 42  | 75  | 215 | 150 | 119 | 45  | 164 | 211      | Bacteria       | Proteobacteria              | Gammaproteobacteria         | unclassified_Bacteria     |                       |  |  |  |  |
| 0  | 0   | 0  | 0   | 26  | 10  | 4   | 0   | 0   | 0   | 0   | 0        | Bacteria       | Proteobacteria              | unclassified_Bacteria       | unclassified_Bacteria     |                       |  |  |  |  |
| 0  | 0   | 0  | 0   | 114 | 117 | 0   | 77  | 61  | 0   | 37  | 8        | Bacteria       | Proteobacteria              | Alphaproteobacteria         | unclassified_Bacteria     |                       |  |  |  |  |
| 0  | 0   | 0  | 0   | 0   | 0   | 0   | 19  | 0   | 0   | 0   | 0        | Bacteria       | Proteobacteria              | Gammaproteobacteria         | unclassified_Bacteria     |                       |  |  |  |  |
| 0  | 0   | 0  | 15  | 0   | 0   | 0   | 0   | 0   | 20  | 0   | 0        | Bacteria       | SAR324_c14deMarine group B) | SAR324_c14deMarine group B) | unclassified_Bacteria     |                       |  |  |  |  |
| 0  | 0   | 0  | 29  | 0   | 0   | 8   | 14  | 14  | 0   | 0   | 0        | Bacteria       | SAR324_c14deMarine group B) | SAR324_c14deMarine group B) | unclassified_Bacteria     |                       |  |  |  |  |
| 5  | 0   | 0  | 0   | 0   | 0   | 0   | 0   | 0   | 0   | 0   | 0        | Bacteria       | SAR324_c14deMarine group B) | SAR324_c14deMarine group B) | unclassified_Bacteria     |                       |  |  |  |  |
| 0  | 0   | 0  | 0   | 0   | 0   | 0   | 0   | 0   | 0   | 0   | 0        | Bacteria       | SAR324_c14deMarine group B) | SAR324_c14deMarine group B) | unclassified_Bacteria     |                       |  |  |  |  |
| 0  | 0   | 0  | 96  | 0   | 0   | 0   | 0   | 0   | 0   | 0   | 0        | Bacteria       | Sphinctobacteria            | Sphinctobacteria            | Alkaliphilobacteriaceae   |                       |  |  |  |  |
| 0  | 0   | 0  | 0   | 0   | 0   | 0   | 0   | 0   | 8   | 10  | 18       | Bacteria       | Brachyspirae                | Brachyspirae                | Brachyspiraceae           |                       |  |  |  |  |
| 0  | 0   | 0  | 0   | 0   | 0   | 0   | 0   | 0   | 0   | 0   | 0        | Bacteria       | Brevimonas                  | Brevimonas                  | Brevimonadaceae           |                       |  |  |  |  |
| 0  | 0   | 0  | 0   | 0   | 5   | 0   | 0   | 5   | 14  | 0   | 10       | Bacteria       | Brevimonas                  | Brevimonas                  | Brevimonadaceae           |                       |  |  |  |  |
| 0  | 0   | 0  | 34  | 0   | 0   | 0   | 0   | 0   | 0   | 0   | 0        | Bacteria       | Sphinctobacteria            | Sphinctobacteria            | Candidatus Mariprochaeata |                       |  |  |  |  |
| 0  | 0   | 0  | 0   | 61  | 76  | 0   | 0   | 0   | 0   | 0   | 0        | Bacteria       | Sphinctobacteria            | Sphinctobacteria            | Candidatus Mariprochaeata |                       |  |  |  |  |
| 0  | 0   | 0  | 0   | 0   | 0   | 0   | 0   | 0   | 0   | 0   | 0        | Bacteria       | Brachyspirae                | Brachyspirae                | Brachyspiraceae           |                       |  |  |  |  |
| 0  | 0   | 0  | 0   | 8   | 0   | 0   | 0   | 0   | 0   | 0   | 0        | Bacteria       | Sphinctobacteria            | unclassified_Bacteria       | unclassified_Bacteria     |                       |  |  |  |  |
| 0  | 0   | 0  | 0   | 0   | 19  | 0   | 0   | 0   | 0   | 20  | 0        | Bacteria       | Brachyspirae                | Brachyspirae                | unclassified_Bacteria     |                       |  |  |  |  |
| 0  | 0   | 0  | 0   | 0   | 0   | 0   | 0   | 0   | 0   | 0   | 0        | Bacteria       | Brachyspirae                | Brachyspirae                | unclassified_Bacteria     |                       |  |  |  |  |
| 0  | 0   | 8  | 47  | 0   | 0   | 0   | 0   | 0   | 0   | 0   | 0        | Bacteria       | Sphinctobacteria            | Sphinctobacteria            | Sphinctobacteriaceae      |                       |  |  |  |  |
| 0  | 0   | 0  | 0   | 0   | 0   | 0   | 0   | 0   | 0   | 0   | 0        | Bacteria       | Sphinctobacteria            | Sphinctobacteria            | Sphinctobacteriaceae      |                       |  |  |  |  |
| 0  | 0   | 0  | 55  | 0   | 22  | 0   | 0   | 24  | 0   | 0   | 35       | Bacteria       | Sphinctobacteria            | Sphinctobacteria            | Sphinctobacteriaceae      |                       |  |  |  |  |
| 0  | 0   | 0  | 82  | 0   | 0   | 0   | 0   | 0   | 0   | 0   | 0        | Bacteria       | Sphinctobacteria            | Sphinctobacteria            | Sphinctobacteriaceae      |                       |  |  |  |  |
| 0  | 0   | 0  | 21  | 0   | 0   | 0   | 0   | 7   | 0   | 0   | 0        | Bacteria       | Sphinctobacteria            | Sphinctobacteria            | Sphinctobacteriaceae      |                       |  |  |  |  |
| 0  | 0   | 0  | 10  | 80  | 96  | 0   | 0   | 20  | 0   | 0   | 0        | Bacteria       | Sphinctobacteria            | Sphinctobacteria            | Sphinctobacteriaceae      |                       |  |  |  |  |
| 0  | 0   | 0  | 0   | 0   | 0   | 0   | 0   | 8   | 0   | 0   | 0        | Bacteria       | Sphinctobacteria            | Sphinctobacteria            | Sphinctobacteriaceae      |                       |  |  |  |  |
| 0  | 0   | 0  | 0   | 25  | 26  | 0   | 17  | 0   | 0   | 0   | 0        | Bacteria       | Sphinctobacteria            | Sphinctobacteria            | Sphinctobacteriaceae      |                       |  |  |  |  |
| 0  | 0   | 0  | 53  | 77  | 0   | 0   | 0   | 0   | 0   | 0   | 0        | Bacteria       | Sphinctobacteria            | Sphinctobacteria            | Sphinctobacteriaceae      |                       |  |  |  |  |
| 0  | 0   | 0  | 0   | 0   | 77  | 0   | 0   | 0   | 0   | 0   | 0        | Bacteria       | Sphinctobacteria            | Sphinctobacteria            | Sphinctobacteriaceae      |                       |  |  |  |  |
| 0  | 0   | 0  | 11  | 26  | 0   | 0   | 0   | 3   | 0   | 10  | 10       | Bacteria       | Sphinctobacteria            | Sphinctobacteria            | Sphinctobacteriaceae      |                       |  |  |  |  |
| 0  | 0   | 0  | 0   | 79  | 0   | 0   | 88  | 73  | 88  | 0   | 0        | Bacteria       | Sphinctobacteria            | Sphinctobacteria            | Sphinctobacteriaceae      |                       |  |  |  |  |
| 17 | 0   | 5  | 0   | 158 | 74  | 0   | 41  | 48  | 157 | 110 | 131      | Bacteria       | Sphinctobacteria            | Sphinctobacteria            | Sphinctobacteriaceae      |                       |  |  |  |  |
| 0  | 66  | 0  | 121 | 68  | 123 | 0   | 15  | 179 | 148 | 31  | 129      | Bacteria       | Sphinctobacteria            | Sphinctobacteria            | Sphinctobacteriaceae      |                       |  |  |  |  |
| 0  | 0   | 0  | 33  | 0   | 0   | 0   | 0   | 0   | 0   | 0   | 0        | Bacteria       | Sphinctobacteria            | Sphinctobacteria            | Sphinctobacteriaceae      |                       |  |  |  |  |
| 0  | 0   | 0  | 36  | 0   | 0   | 0   | 0   | 0   | 0   | 0   | 0        | Bacteria       | Sphinctobacteria            | Sphinctobacteria            | Sphinctobacteriaceae      |                       |  |  |  |  |
| 0  | 0   | 0  | 103 | 107 | 0   | 0   | 0   | 0   | 0   | 0   | 0        | Bacteria       | Sphinctobacteria            | Sphinctobacteria            | Sphinctobacteriaceae      |                       |  |  |  |  |
| 26 | 138 | 33 | 388 | 362 | 287 | 0   | 96  | 378 | 305 | 379 | 281      | Bacteria       | Sphinctobacteria            | Sphinctobacteria            | Sphinctobacteriaceae      |                       |  |  |  |  |
| 0  | 0   | 0  | 0   | 0   | 0   | 0   | 0   | 0   | 0   | 0   | 0        | Bacteria       | Sphinctobacteria            | Sphinctobacteria            | Sphinctobacteriaceae      |                       |  |  |  |  |
| 0  | 0   | 0  | 6   | 0   | 0   | 0   | 0   | 0   | 0   | 0   | 0        | Bacteria       | Sphinctobacteria            | Sphinctobacteria            | Sphinctobacteriaceae      |                       |  |  |  |  |
| 0  | 0   | 0  | 77  | 35  | 42  | 0   | 0   | 0   | 0   | 32  | 0        | Bacteria       | Leptospirae                 | Leptospirae                 | Treponemaceae             |                       |  |  |  |  |
| 0  | 0   | 0  | 0   | 0   | 15  | 0   | 0   | 0   | 0   | 0   | 0        | Bacteria       | Leptospirae                 | Leptospirae                 | Leptospiraceae            |                       |  |  |  |  |
| 0  | 0   | 0  | 77  | 0   | 39  | 0   | 0   | 0   | 0   | 0   | 0        | Bacteria       | Sphinctobacteria            | Sphinctobacteria            | Sphinctobacteriaceae      |                       |  |  |  |  |
| 0  | 0   | 0  | 31  | 37  | 0   | 48  | 53  | 124 | 125 | 48  | 53       | Bacteria       | Sphinctobacteria            | Sphinctobacteria            | Sphinctobacteriaceae      |                       |  |  |  |  |
| 0  | 0   | 0  | 120 | 0   | 0   | 94  | 0   | 0   | 0   | 0   | 15       | Bacteria       | Sphinctobacteria            | Sphinctobacteria            | Sphinctobacteriaceae      |                       |  |  |  |  |
| 0  | 0   | 0  | 0   | 0   | 0   | 0   | 0   | 0   | 0   | 0   | 0        | Bacteria       | Sphinctobacteria            | Sphinctobacteria            | Sphinctobacteriaceae      |                       |  |  |  |  |
| 0  | 0   | 0  | 0   | 0   | 42  | 13  | 0   | 0   | 0   | 0   | 14       | Bacteria       | Sphinctobacteria            | Sphinctobacteria            | Sphinctobacteriaceae      |                       |  |  |  |  |
| 0  | 0   | 0  | 0   | 0   | 0   | 0   | 0   | 0   | 0   | 0   | 24       | Bacteria       | Sphinctobacteria            | Sphinctobacteria            | Sphinctobacteriaceae      |                       |  |  |  |  |
| 0  | 0   | 0  | 65  | 0   | 0   | 0   | 0   | 0   | 0   | 0   | 0        | Bacteria       | Sphinctobacteria            | unclassified_Bacteria       | unclassified_Bacteria     |                       |  |  |  |  |
| 0  | 0   | 0  | 29  | 0   | 0   | 0   | 0   | 0   | 0   | 0   | 0        | Bacteria       | Sphinctobacteria            | VMT7-18E03                  | unclassified_Bacteria     |                       |  |  |  |  |
| 0  | 0   | 0  | 0   | 0   | 0   | 0   | 0   | 0   | 13  | 10  | 14       | Bacteria       | Sumnerellae                 | Sumnerellae                 | Sumnerellaceae            |                       |  |  |  |  |
| 0  | 0   | 0  | 0   | 0   | 0   | 0   | 0   | 7   | 0   | 0   | 0        | Bacteria       | Sumnerellae                 | Sumnerellae                 | Sumnerellaceae            |                       |  |  |  |  |
| 0  | 0   | 0  | 0   | 0   | 0   | 0   | 0   | 11  | 0   | 0   | 0        | Bacteria       | Sumnerellae                 | Sumnerellae                 | Sumnerellaceae            |                       |  |  |  |  |
| 0  | 0   | 0  | 0   | 14  | 0   | 0   | 0   | 0   | 0   | 0   | 0        | Bacteria       | Sumnerellae                 | Sumnerellae                 | Sumnerellaceae            |                       |  |  |  |  |
| 0  | 0   | 0  | 0   | 16  | 0   | 0   | 0   | 14  | 0   | 0   | 0        | Bacteria       | Sumnerellae                 | Sumnerellae                 | Sumnerellaceae            |                       |  |  |  |  |
| 0  | 0   | 0  | 0   | 0   | 0   | 0   | 0   | 10  | 0   | 0   | 0        | Bacteria       | Sumnerellae                 | Sumnerellae                 | Sumnerellaceae            |                       |  |  |  |  |
| 0  | 0   | 0  | 0   | 25  | 24  | 0   | 0   | 49  | 0   | 0   | 0        | Bacteria       | Sumnerellae                 | unclassified_Bacteria       | unclassified_Bacteria     |                       |  |  |  |  |
| 0  | 0   | 0  | 0   | 0   | 0   | 0   | 0   | 17  | 0   | 0   | 0        | Bacteria       | Sumnerellae                 | unclassified_Bacteria       | unclassified_Bacteria     |                       |  |  |  |  |
| 10 | 0   | 0  | 0   | 79  | 108 | 0   | 18  | 0   | 25  | 41  | 0        | Bacteria       | Sumnerellae                 | unclassified_Bacteria       | unclassified_Bacteria     |                       |  |  |  |  |
| 0  | 0   | 0  | 0   | 0   | 0   | 0   | 0   | 0   | 0   | 0   | 0        | Bacteria       | Sumnerellae                 | unclassified_Bacteria       | unclassified_Bacteria     |                       |  |  |  |  |
| 0  | 0   | 0  | 0   | 0   | 44  | 0   | 0   | 0   | 0   | 0   | 0        | Bacteria       | Sumnerellae                 | unclassified_Bacteria       | unclassified_Bacteria     |                       |  |  |  |  |
| 0  | 0   | 0  | 0   | 30  | 0   | 0   | 0   | 0   | 0   | 0   | 0        | Bacteria       | Sumnerellae                 | unclassified_Bacteria       | unclassified_Bacteria     |                       |  |  |  |  |
| 0  | 0   | 0  | 0   | 0   | 0   | 0   | 0   | 0   | 0   | 0   | 0        | Bacteria       | Sumnerellae                 | unclassified_Bacteria       | unclassified_Bacteria     |                       |  |  |  |  |
| 0  | 0   | 0  | 0   | 0   | 26  | 0   | 0   | 20  | 0   | 0   | 0        | Bacteria       | Thermoplasmatia             | Thermoplasmatia             | unclassified_Archaea      |                       |  |  |  |  |
| 0  | 0   | 0  | 0   | 0   | 12  | 0   | 0   | 0   | 0   | 0   | 0        | Bacteria       | Thermoplasmatia             | Thermoplasmatia             | unclassified_Archaea      |                       |  |  |  |  |
| 0  | 0   | 0  | 0   | 0   | 0   | 0   | 24  | 0   | 0   | 28  | 0        | Bacteria       | Verrucomicrobia             | Chthoniobacteriales         | unclassified_Bacteria     |                       |  |  |  |  |
| 0  | 0   | 0  | 0   | 0   | 0   | 0   | 0   | 0   | 0   | 0   | 0        | Bacteria       | Verrucomicrobia             | Omnithiophiles              | Omnithiophiles            |                       |  |  |  |  |
| 0  | 0   | 0  | 0   | 0   | 0   | 0   | 0   | 0   | 0   | 0   | 0        | Bacteria       | Verrucomicrobia             | Omnithiophiles              | Omnithiophiles            |                       |  |  |  |  |
|    |     |    |     |     |     |     |     |     |     |     |          |                |                             |                             |                           |                       |  |  |  |  |
